# Supplementary material for: Nuclear factor κB overactivation in the intervertebral disc leads to macrophage recruitment and severe disc degeneration
Source: PubMed Central journal article supplement — Sci Adv. 2024 Jun 7;10(23):eadj3194. doi: 10.1126/sciadv.adj3194 (PMC11160472; doi:10.1126/sciadv.adj3194), 2024-06-07
Supplement: sciadv.adj3194_sm.pdf [file sciadv.adj3194_sm.pdf]

Supplementary Materials for  
**Nuclear factor  $\kappa$ B overactivation in the intervertebral disc leads to  
macrophage recruitment and severe disc degeneration**

Kevin G. Burt *et al.*

Corresponding author: Nadeen O. Chahine, noc7@columbia.edu

*Sci. Adv.* **10**, eadj3194 (2024)  
DOI: 10.1126/sciadv.adj3194

**This PDF file includes:**

Figs. S1 to S6  
Tables S1 and S2

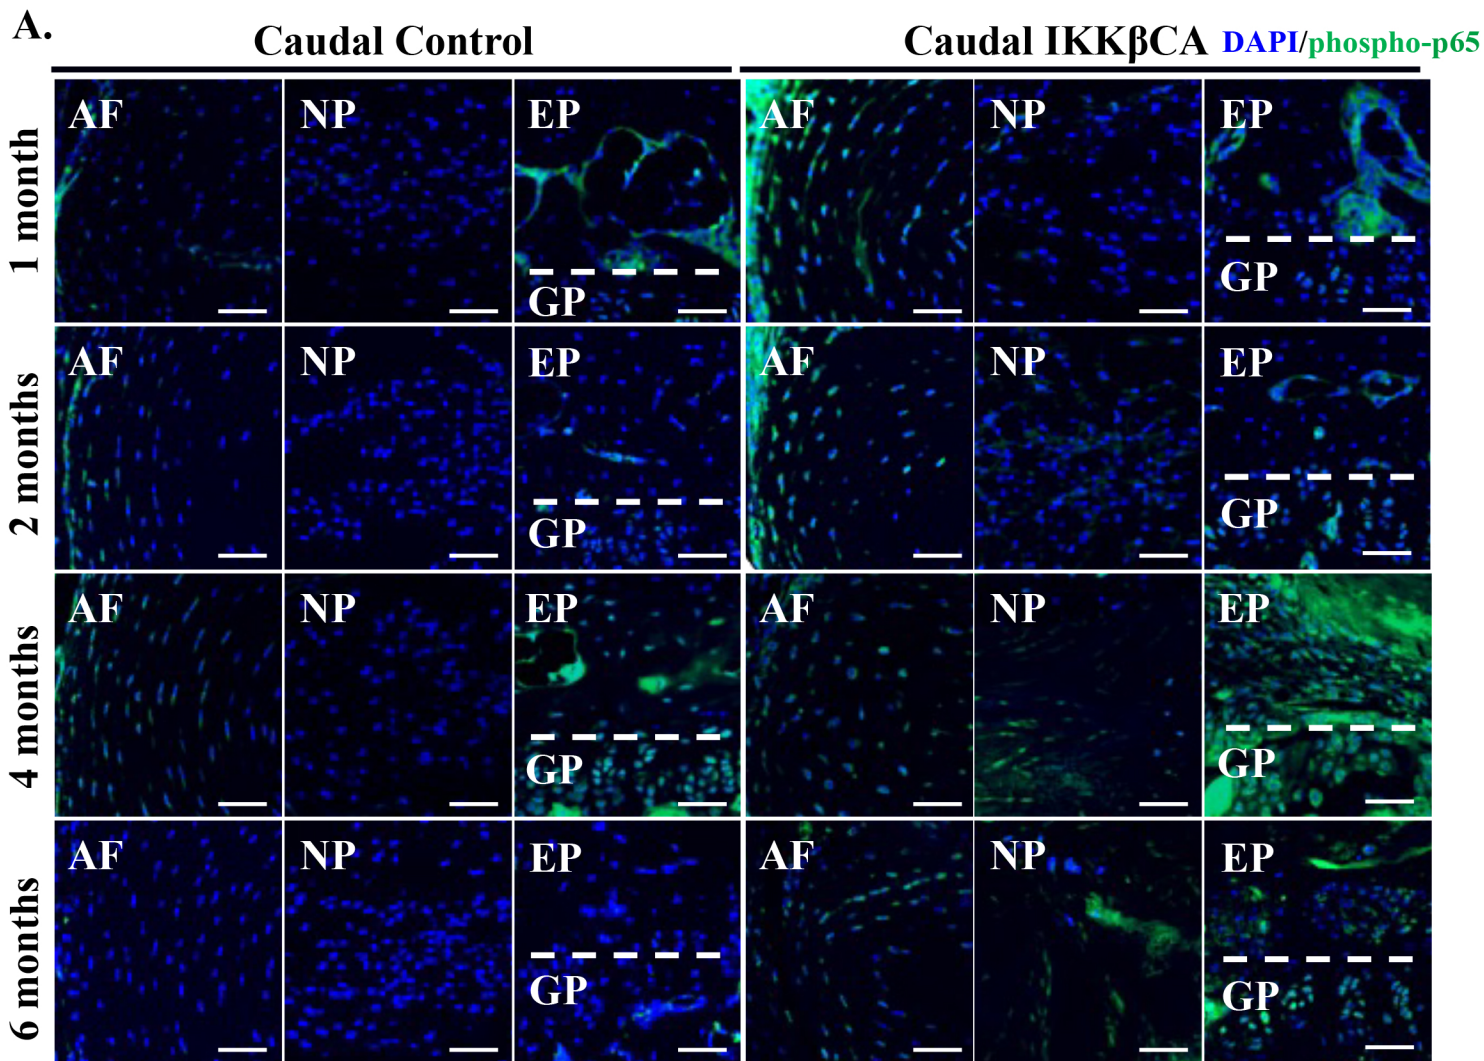

**B.** Caudal phospho-p65 expression  Control  IKK $\beta$ CA

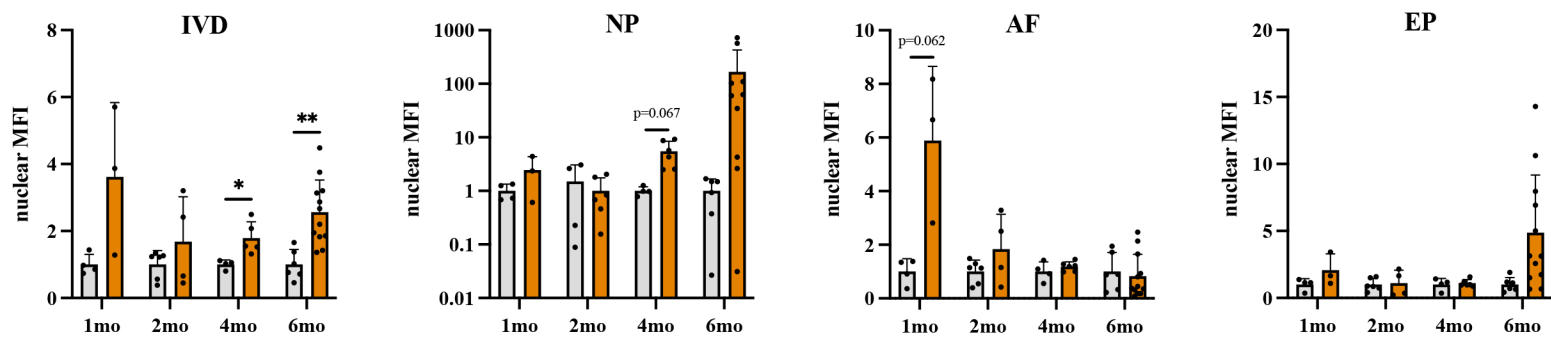

**Fig. S1. NF- $\kappa$ B activation within IKK $\beta$ CA caudal IVDs.** (A) Representative IF staining for phosphorylated p65 (green) within mid sagittal sections of control (*AcanCre<sup>-/-</sup>;Ikk2ca<sup>fl/fl</sup>*) and IKK $\beta$ CA caudal IVDs. Scale bar = 50 $\mu$ m. (B) Nuclear MFI quantification (normalized to control within time point) of phosphorylated p65. \* $p < 0.05$ , \*\* $p < 0.01$  ( $n = 3-6$  mice/group, 1-2 discs/mouse).

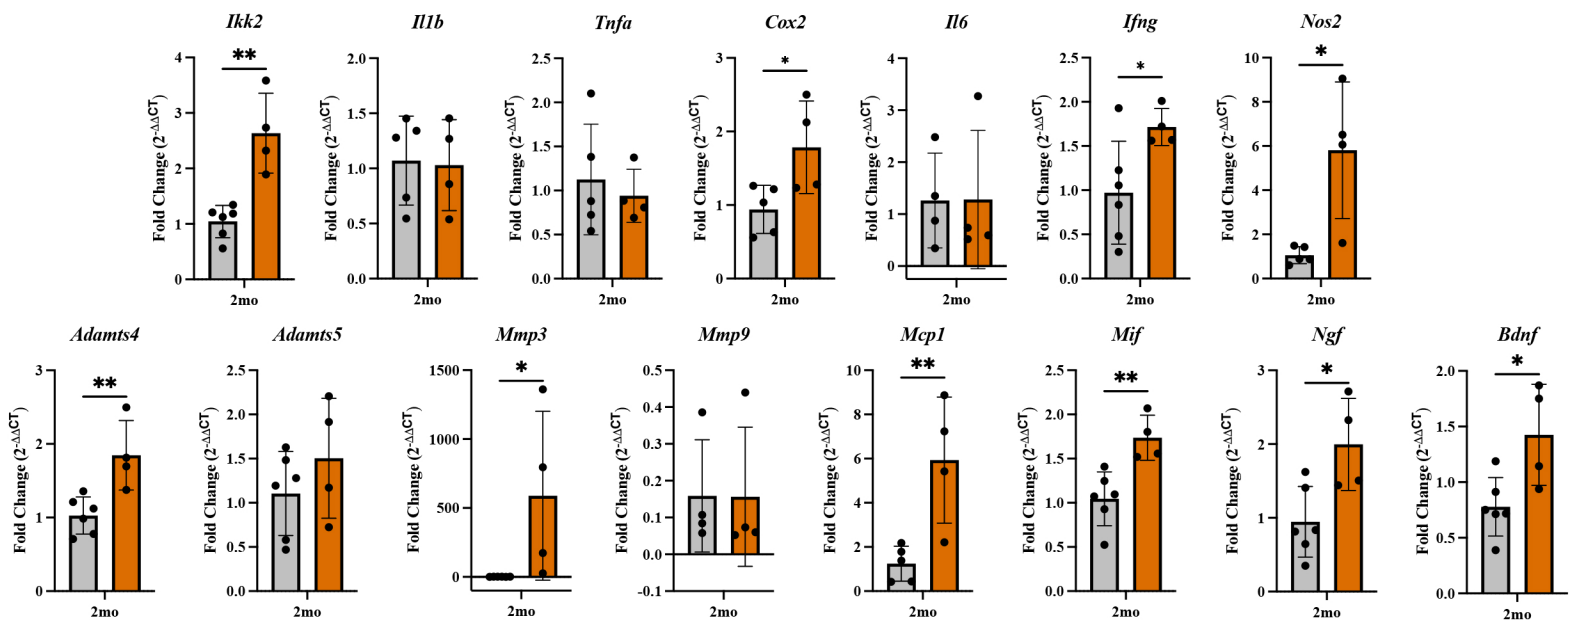

**Fig. S2. IKKβ over-expression upregulates caudal IVD inflammatory cytokine, chemokine, catabolic enzyme, and neurotrophic factor gene expression.** Gene expression changes (relative to control) from total RNA isolated from control (*AcanCre<sup>-/-</sup>;Ikk2ca<sup>fl/fl</sup>*) and IKKβCA whole caudal IVDs containing NP, AF, and EP, 2-months post recombination. \*p<0.05, \*\*p<0.01, \*\*\*p<0.001. (n=3 mice/genotype per timepoint, 1-2 discs/mouse).

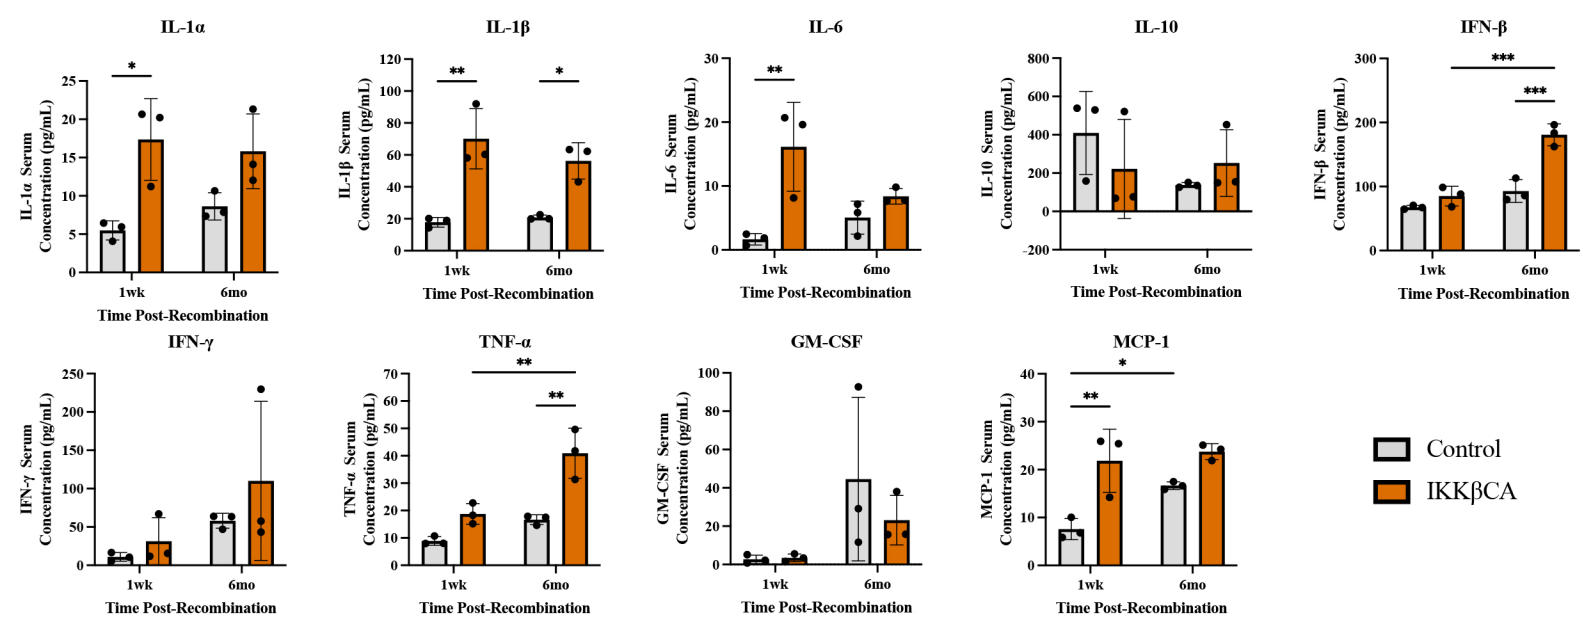

**Fig. S3. IKK $\beta$  over-expression upregulates circulating inflammatory cytokine and chemokines in the serum.** Cytokine and chemokine levels within serum isolated from control (*AcanCre<sup>-/-</sup>Ikk2ca<sup>fl/fl</sup>*) and IKK $\beta$ CA mice 1 week and 6 months post recombination. \*p<0.05, \*\*p<0.01, \*\*\*p<0.001 (n=3/genotype per timepoint).

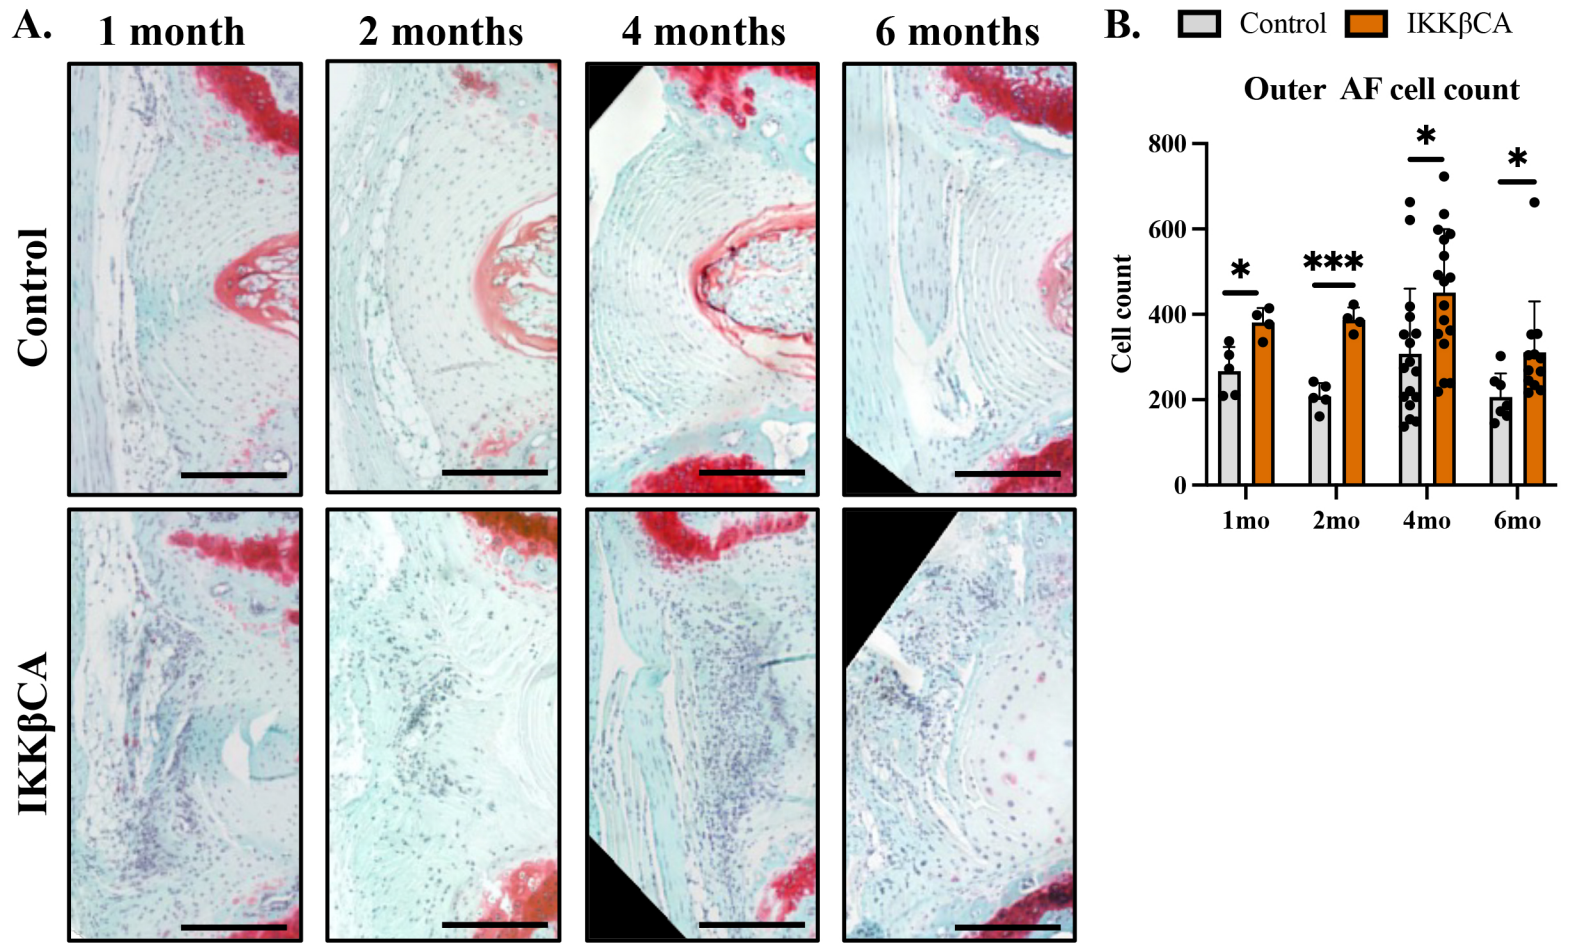

**Fig. S4. IKK $\beta$  over-expression increases cellularity presence within the caudal AF.** (A) Representative images of safranin-O stained mid sagittal sections of control (*AcanCre<sup>-/-</sup>;Ikk2ca<sup>fl/fl</sup>*) and IKK $\beta$ CA caudal IVDs 1-, 2-, 4-, and 6-months post recombination. Scale bar = 250 $\mu$ m. (B) Quantification of outer AF cellularity using haematoxylin nuclear stain (n=4-6 mice/genotype and timepoint, 1-4 IVDs/mouse).

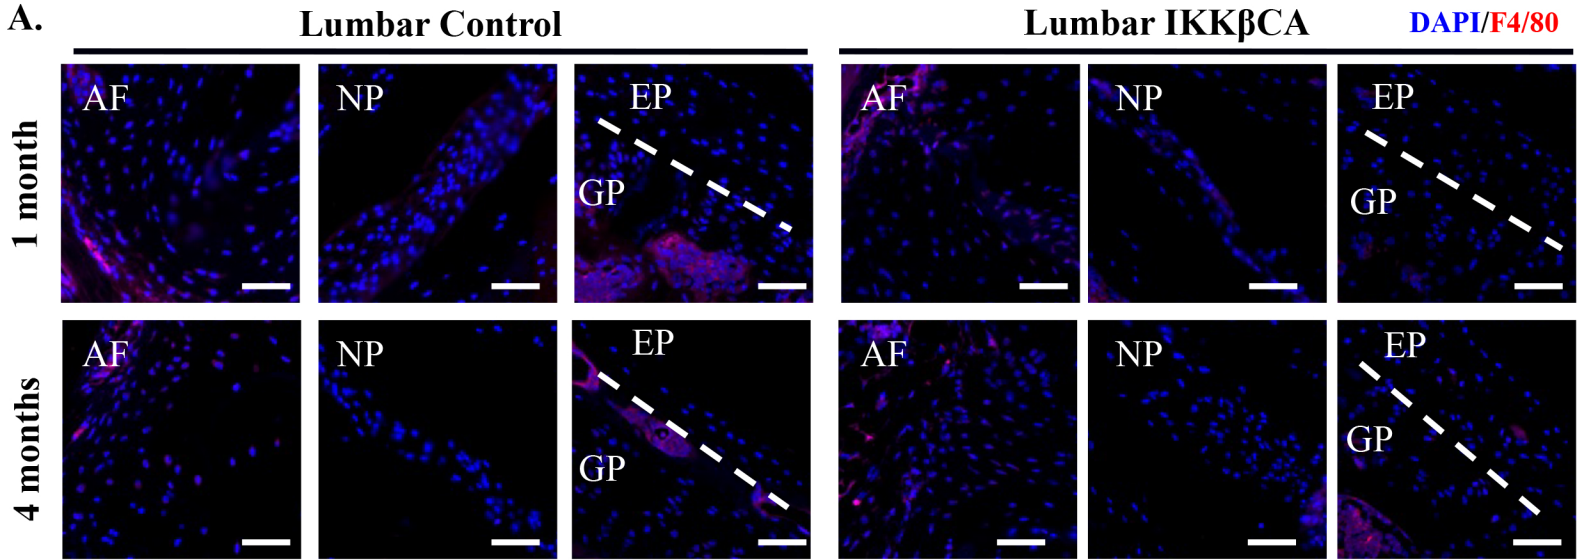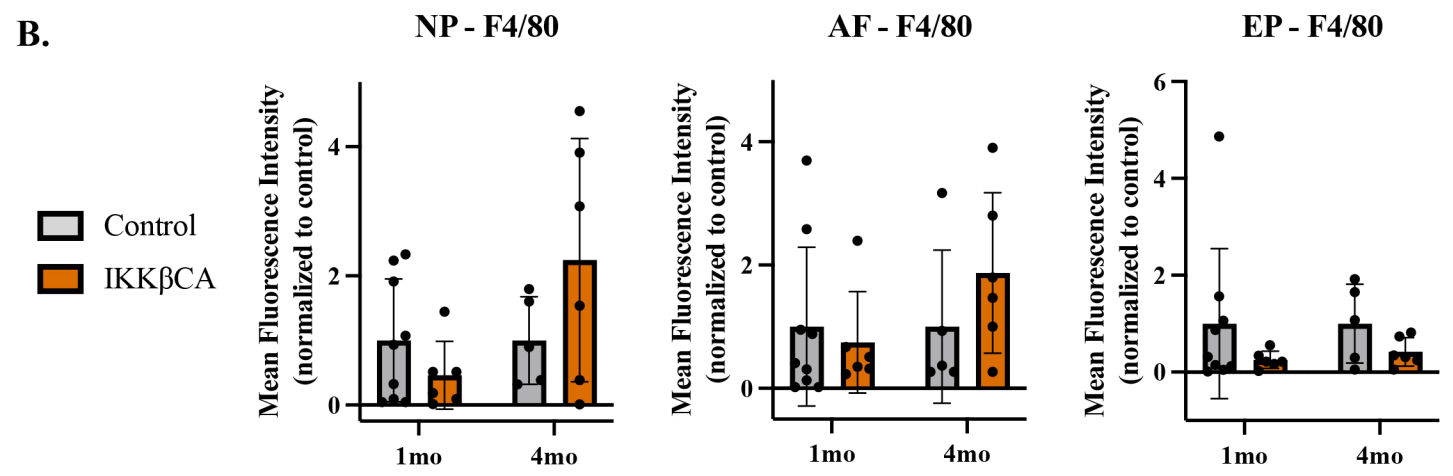

**Fig. S5. Macrophage presence within the lumbar IVDs.** (A) Representative images of IF staining for F4/80, in mid sagittal sections of control (*AcanCre<sup>-/-</sup>Ikk2ca<sup>fl/fl</sup>*) and IKK $\beta$ CA lumbar IVDs at 1- and 4-months post recombination. Scale bar = 100 $\mu$ m. (B) MFI quantification of F4/80 expression within individual NP, AF, and EP compartments. Letters (a,b,c) indicating statistically significant ( $p < 0.05$ ) different groupings. (n=3-6 mice/genotype, 1-2 discs/mouse).

**M0****M1****M2****Control-CM**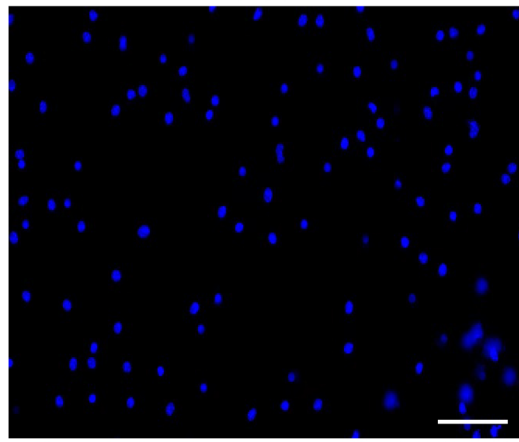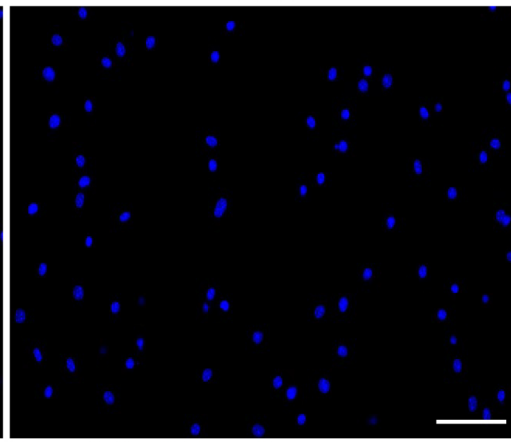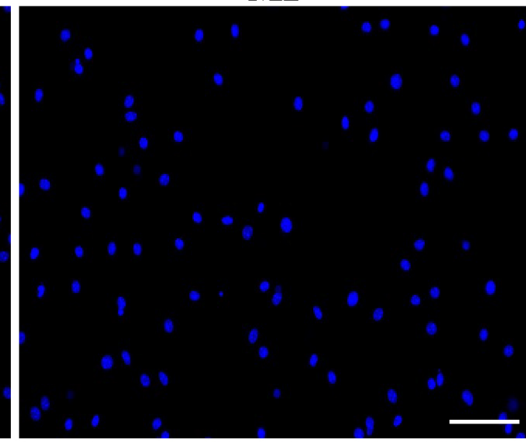**IKKβCA-CM**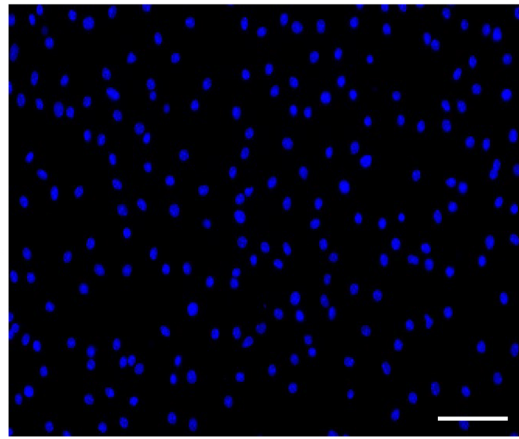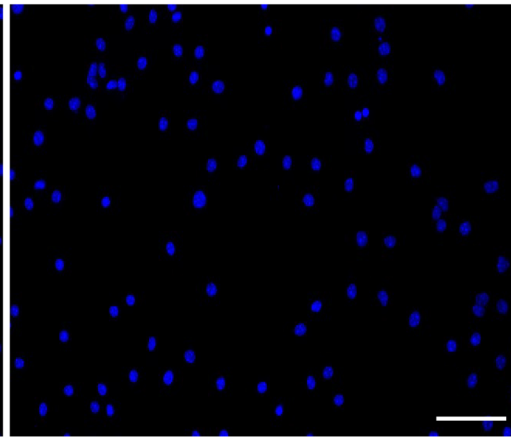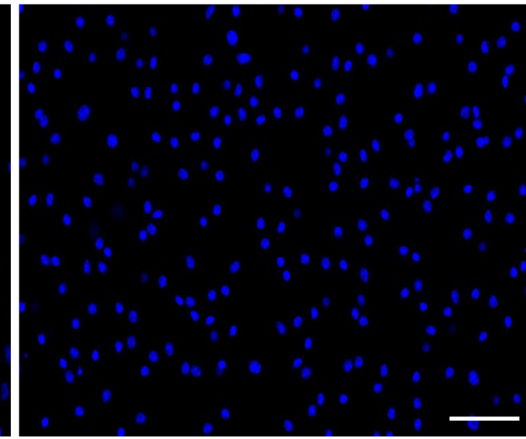

**Fig. S6. Caudal IKK $\beta$ CA-CM increases macrophage migration *in vitro*.** Representative images of DAPI (nuclear) stained M0, M1, and M2 macrophages on transwell membranes following caudal IKK $\beta$ CA-CM stimulation. Cell counting used for quantification of migration through transwell membranes. Scale bar = 100 $\mu$ m (n=3).

**Table S1: FWD and REV murine primers (IDT) for rt-qPCR.**

| Gene Target, murine                                                                           | Forward Primer                  | Reverse Primer                  |
|-----------------------------------------------------------------------------------------------|---------------------------------|---------------------------------|
| Glyceraldehyde-3-phosphate dehydrogenase ( <i>Gapdh</i> )                                     | AAC AGC AAC TCC CAC TCT TC      | CCT GTT GCT GTA GCC GTA TT      |
| inhibitor of nuclear factor kappa B kinase subunit beta ( <i>Ikk2</i> )                       | CTG AAG ATC GCC TGT AGA AA      | TCC ATC TGT AAC CAG CTC CAG     |
| interleukin-6 ( <i>Il6</i> )                                                                  | CTT CCA TCC AGT TGC CTT CT      | CTC CGA CTT GTG AAG TGG TAT AG  |
| tumor necrosis factor alpha ( <i>Tnfa</i> )                                                   | TTG CTC TGT GAA GGG AAT GG      | GGC TCT GAG GAG TAG ACA ATA AAG |
| interleukin-1 beta ( <i>Il1b</i> )                                                            | ATG GGC AAC CAC TTA CCT ATT T   | GTT CTA GAG AGT GCT GCC TAA TG  |
| nitric oxide synthase 2 ( <i>Nos2</i> )                                                       | TCT CCC TTT CCT CCC TTC TT      | CTT CAG TCA GGA GGT TGA GTT T   |
| interferon gamma ( <i>Ifng</i> )                                                              | GGC CAT CAG CAA CAA CAT AAG     | GTT GAC CTC AAA CTT GGC AAT AC  |
| Prostaglandin-Endoperoxide Synthase 2 ( <i>Ptgs2/Cox2</i> )                                   | GAA GAT TCC CTC CGG TGT TT      | CCC TTC TCA CTG GCT TAT GTA G   |
| Cluster of differentiation 38 ( <i>CD38</i> )                                                 | TCT CTC TCT CTC TCT CTC TCT CT  | TCA GCT GTG CTG AGG ATT TAG     |
| Cluster of differentiation 206 ( <i>CD206</i> )                                               | GGA ATC AAG GGC ACA GAG TTA     | TTC CAT CTG CTC CAC AAT CC      |
| monocyte chemoattractant protein-1 ( <i>Mcp1</i> )                                            | CTC GGA CTG TGA TGC CTT AAT     | TGG ATC CAC ACC TTG CAT TTA     |
| macrophage inhibitory factor ( <i>Mif</i> )                                                   | GTT CCA CCT TCG CTT GAG T       | CAT CGC TAC CGG TGG ATA AA      |
| Matrix Metalloproteinase 3 ( <i>Mmp3</i> )                                                    | GGA CCA GGG ATT AAT GGA GAT G   | TGA GCA GCA ACC AGG AAT AG      |
| Matrix Metalloproteinase 9 ( <i>Mmp9</i> )                                                    | CTG GAA CTC ACA CGA CAT CTT     | TCC ACC TTG TTC ACC TCA TTT     |
| A Disintegrin-Like And Metalloprotease With Thrombospondin Type 1, Motif 4 ( <i>Adamts4</i> ) | GGC AGA GAA GGG ATG ATG TAA TAG | CCC AAC ATC ACC CAG GTA ATA A   |
| A Disintegrin-Like And Metalloprotease With Thrombospondin Type 1, Motif 5 ( <i>Adamts5</i> ) | GTG CTG TGT TTG CCA TCT TC      | GCA CTG CCT TGT TCT GTT TC      |
| nerve growth factor ( <i>Ngf</i> )                                                            | CAG TGA GGT GCA TAG CGT AAT     | CTC CTT CTG GGA CAT TGC TAT C   |
| brain derived neurotrophic factor ( <i>Bdnf</i> )                                             | CAA GAG TCC CGT CTG TAC TTT AC  | GAC TAG GGA AAT GGG CTT AAC A   |



**Table S2: Primary and secondary fluorescent antibodies used for immunohistochemistry.**

| Antigen                          | Company       | Cat #      | Dilution |
|----------------------------------|---------------|------------|----------|
| [1°] mCherry                     | Sicgen        | AB0040-200 | 1:250    |
| [1°] Phosphorylated p-65         | Abcam         | AB86299    | 1:500    |
| [1°] F4/80                       | Bio-rad       | MCA497GA   | 1:100    |
| [1°] IKK $\beta$                 | Sigma         | 07-1479    | 1:500    |
| [1°] CD38                        | Fisher        | PIMA516871 | 1:100    |
| [1°] CD206                       | Fisher        | PIPA595840 | 1:100    |
| [2°] Donkey anti-goat (AF 594)   | Thermo Fisher | A-11058    | 1:250    |
| [2°] Donkey anti-rabbit (AF 594) | Abcam         | AB150064   | 1:200    |
| [2°] Donkey anti-rat (AF 488)    | Abcam         | Ab150153   | 1:200    |
